# Supplementary material
Source: HighWire-hosted journal article supplement (http://molpharm.aspetjournals.org/highwire/filestream/76315/field_highwire_adjunct_files/4/Supplementary_movie_Movie_S1.pdf)
Supplement: Supplementary_movie_Movie_S1.pdf [file Supplementary_movie_Movie_S1.pdf]

**In vivo labeling of brain capillary endothelial cells following intravenous injection of monoclonal antibodies targeting the transferrin receptor**

Sarah Paris-Robidas, B.Sc., Vincent Emond, Ph.D., Cytia Tremblay, M.Sc., Denis Soulet, Ph.D., and Frédéric Calon, B.Pharm., Ph.D.

**Movie S1. Evidence of internalization within brain microvessels of fluorolabeled MAbs targeting the TfR.** Three-dimensional reconstruction of the vessels and capillaries shown in Figure 6. Merged confocal images shows brain microvessels immunolabeled with CD31 (green), DAPI (cyan), basal lamina marker collagen IV (red) and AF647-conjugated anti-TfR MAbs Ri7 (white). Abbreviations: MAbs, monoclonal antibodies; TfR, transferrin receptor.
